# Supplementary material for: A polyA DNA probe-based ultra-sensitive and structure-distinguishable electrochemical biosensor for the analysis of RNAi transgenic maize
Source: Royal Society of Chemistry journal article supplement (doi:10.1039/d1an00313e), 2021-01-01
Supplement: d1an00313e1.pdf [file d1an00313e1.pdf]

## Supporting Information for:

# A polyA DNA probe-based ultra-sensitive and structure-distinguishable electrochemical biosensor for the analysis of RNAi transgenic maize

Li Xu<sup>a‡</sup>, Jiawei Qi<sup>ac§</sup>, Yanli Wen<sup>a</sup>, Wen Liang<sup>a</sup>, Lele Wang<sup>a</sup>, Zhenzhou Yang<sup>a</sup>, Xue Yang<sup>a</sup>, Yu Qi<sup>a</sup>, Manlei Duan<sup>a</sup>, Keke Zhao<sup>a</sup>, Jie Gu<sup>a</sup>, Yiji Shen<sup>a</sup>, Pinhua Rao<sup>c</sup>, Min Ding<sup>a</sup>, Shuzhen Ren<sup>a</sup>, Liang Li<sup>\*b</sup>, and Gang Liu<sup>\*a</sup>

- a. Laboratory of Biometrology, Division of Chemistry and Ionizing Radiation Measurement Technology, Shanghai Institute of Measurement and testing technology, Shanghai, 201203, P.R. China.
- b. Biotechnology Research Institute, Chinese Academy of Agricultural Sciences, Beijing 100081, China.
- c. College of Chemistry and Chemical Engineering, Shanghai University of Engineering Science, Shanghai, 201620, P.R. China.

## 1 Investigation of hybridization temperature

To further improve the detection sensitivity of our E-biosensor, we investigated the performance of the E-biosensor at six different hybridization temperatures. The hybridization reactions were carried out at 22 °C, 37 °C, 45 °C, 50 °C, 55 °C and 60 °C. As indicated in Figure 6, the E-biosensor showed the highest S/N ratio at 50 °C, suggesting that the higher temperature might affect the dynamics of hybridization. Thus, 50 °C were used as the hybridization temperature for following experiments.

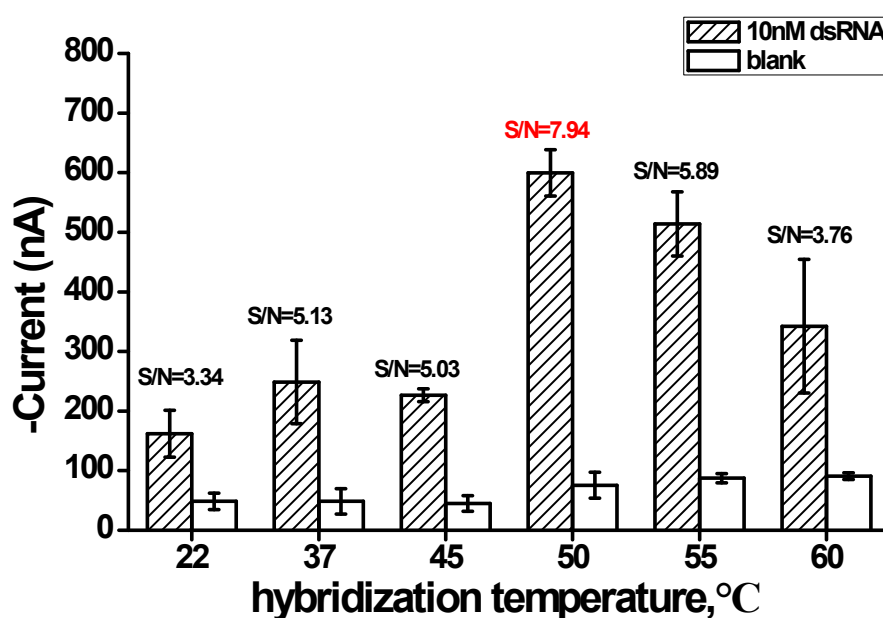

Figure S1, optimization results of hybridization temperature of the E-biosensor

## 2 preparation of siRNA

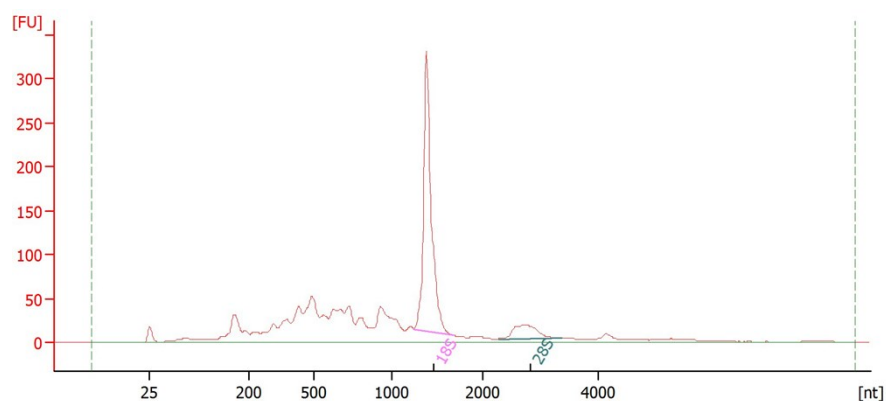

Figure S2, Characterization of purified siRNA with Agilent 2100 bioanalyzer. The siRNA was produced by digesting the long RNA with Rnase III.

## 3 Quantification of GMO samples

Table S1. Analysis of dsRNA concentration in RNAi-based transgenic maize leaves by dPCR

| RNAi-based transgenic maize leaves | Concentration (copies/ $\mu$ L) |
|------------------------------------|---------------------------------|
| 11061-P                            | $1.18 \times 10^5$              |
| 11019-P                            | $5.83 \times 10^4$              |
| 11048-P                            | $1.52 \times 10^5$              |
| 11061-N                            | $2.44 \times 10^2$              |
| Blank                              | 0                               |

\*The dPCR reactions were performed with different primer/probe sets targeting the different dsRNA sequences in 11061-P, 11019-P, 11048-P and 11061-N. A TE buffer was analysis as the blank.

## 4 Electrode preparation

Gold electrodes were cleaned following a reported protocol. Briefly, gold electrodes (2 mm in diameter, CH Instruments Inc., Austin, TX) were firstly polished with micropolish alumina suspensions then sonicated in ethanol and Milli-Q water for 2 min respectively. Then the electrodes were electrochemically treated in a freshly prepared in 0.5 M H<sub>2</sub>SO<sub>4</sub> solution. Finally, electrodes were rinsed with Milli-Q water and then blow-dried with nitrogen.
